# Supplementary material for: Separation of the heme protein cytochrome C using a 3D structured graphene oxide bionanocomposite as an adsorbent
Source: Royal Society of Chemistry journal article supplement (doi:10.1039/d3sm01053h), 2024-01-01
Supplement: d3sm01053h1.pdf [file d3sm01053h1.pdf]

## Supplementary Data

### Separation of the heme protein Cytochrome C using a 3D structured graphene oxide bionanocomposite as adsorbent

Caroline Maria Bezerra de Araujo, Albertina Gonçalves Rios, Marcos Gomes Ghislandi, Alexandre Filipe Porfírio Ferreira, Maurício Alves da Motta Sobrinho, and Alírio Egídio Rodrigues

#### S.1 Adsorption Thermodynamics

The results of the adsorption isotherms obtained at three different temperatures, as well as the respective modelling for the Langmuir and Freundlich models are presented in Figure S1 and Table S1. As observed, all the isotherms exhibited a good fit to both isotherm models, however, at  $T = 19\text{ }^{\circ}\text{C}$ , the Freundlich model showed a better fit to the experimental data, indicating the occurrence of multilayer adsorption on heterogeneous sites; on the other hand, at  $T = 31\text{ }^{\circ}\text{C}$ , the Langmuir model showed a better fit to the experimental data, indicating a monolayer adsorption process.

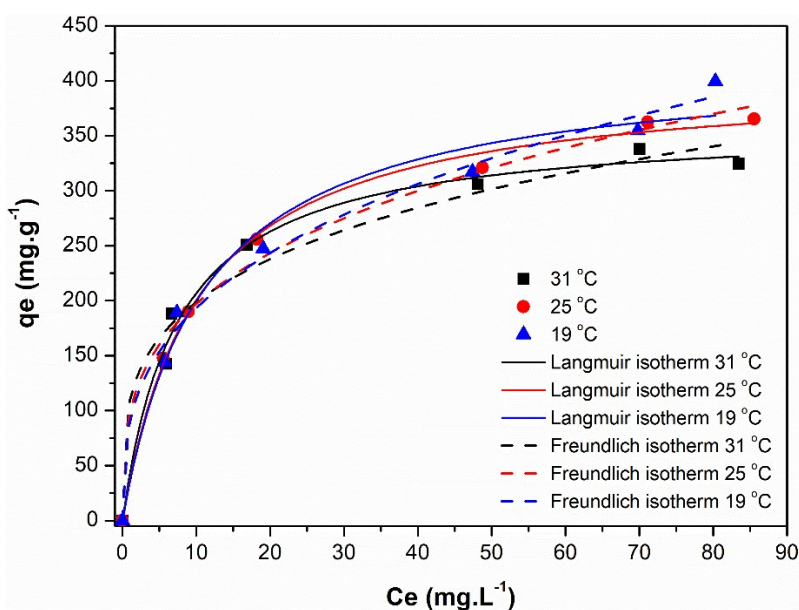

**Fig. S1** Adsorption isotherms at three different temperatures, and modelling for the Langmuir and Freundlich isotherm models.

**Table S1:** Isotherms modelling parameters at different temperatures.

| T (°C) | Experimental<br>$q_{e\text{ max}}$ (mg.g <sup>-1</sup> ) | Langmuir                       |                                           |       | Freundlich                                                             |      |       |
|--------|----------------------------------------------------------|--------------------------------|-------------------------------------------|-------|------------------------------------------------------------------------|------|-------|
|        |                                                          | $K_L$<br>(L.mg <sup>-1</sup> ) | $q_{\text{max}}$<br>(mg.g <sup>-1</sup> ) | $R^2$ | $K_F$<br>(mg <sup>1-(1/n)</sup> .(g <sup>-1</sup> ).L <sup>1/n</sup> ) | n    | $R^2$ |
| 31     | 324.53                                                   | 0.135                          | 360.68                                    | 0.989 | 109.64                                                                 | 3.87 | 0.971 |
| 25     | 365.32                                                   | 0.098                          | 404.33                                    | 0.997 | 98.33                                                                  | 3.31 | 0.990 |
| 19     | 399.49                                                   | 0.091                          | 418.57                                    | 0.976 | 90.15                                                                  | 3.02 | 0.990 |

The Van't Hoff plot was used to estimate the values regarding enthalpy and entropy changes in the Cytochrome C adsorption onto the GO-based bionanocomposite under different temperatures is depicted in Figure S2. Thermodynamic parameters were estimated from the slope and intercept of the graph.

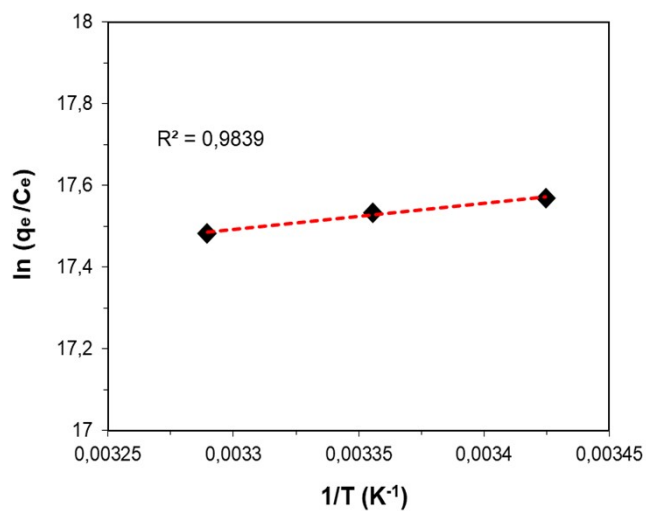

**Fig. S2** Van't Hoff plot for Cytochrome C adsorption onto the GO-based bionanocomposite
